# Supplementary material for: Antiparasitic Potential of Chromatographic Fractions of Nephrolepis biserrata and Liquid Chromatography-Quadrupole Time-of-Flight-Mass Spectrometry Analysis
Source: PubMed Central journal article supplement (PMC7832296; doi:10.3390/molecules26020499), 2021-01-19
Supplement: molecules-26-00499-s001.pdf [file molecules-26-00499-s001.pdf]

## Supplementary data

Table S1: Data of death time and percentage of the fractions of *N. biserrata* against the marine leeches in replicates

|                         |                 | Replicates 1-3 5 leeches per Group |                            |                            |              |                    |         |
|-------------------------|-----------------|------------------------------------|----------------------------|----------------------------|--------------|--------------------|---------|
| Groups                  | No of Parasites | Death Time<br>Experiment 1         | Death Time<br>Experiment 2 | Death Time<br>Experiment 3 | Average Mean | Average SD         | Death % |
| Control                 | 1               | 0                                  | 0                          | 0                          |              |                    | 0       |
|                         | 2               | 0                                  | 0                          | 0                          |              |                    | 0       |
|                         | 3               | 0                                  | 0                          | 0                          |              |                    | 0       |
|                         | 4               | 0                                  | 0                          | 0                          |              |                    | 0       |
|                         | 5               | 0                                  | 0                          | 0                          |              |                    | 0       |
|                         |                 | <b>Mean</b>                        | 0                          | 0                          | 0            | 0                  |         |
|                         | <b>SD</b>       | 0                                  | 0                          | 0                          |              | 0                  |         |
| Formalin ( 0.02%) (v/v) | 1               | 3.4                                | 3                          | 3.44                       |              |                    | 100     |
|                         | 2               | 3.4                                | 4                          | 3.55                       |              |                    | 100     |
|                         | 3               | 3.46                               | 3.44                       | 4                          |              |                    | 100     |
|                         | 4               | 6                                  | 5.4                        | 4.55                       |              |                    | 100     |
|                         | 5               | 3.5                                | 4                          | 3.4                        |              |                    | 100     |
|                         |                 | <b>Mean</b>                        | 3.952                      | 3.968                      | 3.788        | <b>3.90266667</b>  |         |
|                         | <b>SD</b>       | 1.145652652                        | 0.903946901                | 0.488333902                |              | <b>0.845977819</b> |         |

*Nephrolepis biserrata*  
**Fraction1 (NB F1)**  
**(4.80 mg/ml)**

|   |   |   |   |   |   |
|---|---|---|---|---|---|
| 1 | 0 | 0 | 0 | 0 | 0 |
| 2 | 0 | 0 | 0 | 0 | 0 |
| 3 | 0 | 0 | 0 | 0 | 0 |
| 4 | 0 | 0 | 0 | 0 | 0 |
| 5 | 0 | 0 | 0 | 0 | 0 |

|             |   |   |   |   |   |
|-------------|---|---|---|---|---|
| <b>Mean</b> | 0 | 0 | 0 | 0 | 0 |
| <b>SD</b>   | 0 | 0 | 0 | 0 | 0 |

**NB F2 (20 mg/ml)**

|   |   |   |   |   |   |
|---|---|---|---|---|---|
| 1 | 0 | 0 | 0 | 0 | 0 |
| 2 | 0 | 0 | 0 | 0 | 0 |
| 3 | 0 | 0 | 0 | 0 | 0 |
| 4 | 0 | 0 | 0 | 0 | 0 |
| 5 | 0 | 0 | 0 | 0 | 0 |

|             |   |   |   |   |   |
|-------------|---|---|---|---|---|
| <b>Mean</b> | 0 | 0 | 0 | 0 | 0 |
| <b>SD</b>   | 0 | 0 | 0 | 0 | 0 |

**NB F3 (2.50 mg/ml)**

|   |      |      |      |  |     |
|---|------|------|------|--|-----|
| 1 | 1.4  | 1.15 | 1.45 |  | 100 |
| 2 | 3    | 1.3  | 2    |  | 100 |
| 3 | 2.3  | 1.41 | 3    |  | 100 |
| 4 | 2.14 | 2.07 | 1.15 |  | 100 |
| 5 | 3    | 2.07 | 2.07 |  | 100 |

|             |             |            |             |                    |                    |
|-------------|-------------|------------|-------------|--------------------|--------------------|
| <b>Mean</b> | 2.368       | 1.4825     | 1.934       | <b>1.928166667</b> |                    |
| <b>SD</b>   | 0.669417657 | 0.40590434 | 0.708540754 |                    | <b>0.594620917</b> |

|                         |   |       |      |      |     |
|-------------------------|---|-------|------|------|-----|
| <i>NB F4 (14 mg/ml)</i> | 1 | 30.5  | 30   | 32.5 | 100 |
|                         | 2 | 32.29 | 33   | 33.3 | 100 |
|                         | 3 | 34    | 36.9 | 36.4 | 100 |
|                         | 4 | 38    | 40   | 38   | 100 |
|                         | 5 | 38    | 34.5 | 39.4 | 100 |

|             |             |             |             |                    |
|-------------|-------------|-------------|-------------|--------------------|
| <b>Mean</b> | 33.6975     | 34.975      | 35.05       | <b>34.57416667</b> |
| <b>SD</b>   | 3.204583956 | 4.382065723 | 2.587791851 | <b>3.39148051</b>  |

|                            |   |       |      |      |     |
|----------------------------|---|-------|------|------|-----|
| <i>NB F5 (15.30 mg/ml)</i> | 1 | 31    | 33   | 32.2 | 100 |
|                            | 2 | 37.17 | 35   | 34.5 | 100 |
|                            | 3 | 37.2  | 39.9 | 34.6 | 100 |
|                            | 4 | 43.11 | 41.2 | 43   | 100 |
|                            | 5 | 43.35 | 42   | 43.7 | 100 |

|             |            |             |            |                    |
|-------------|------------|-------------|------------|--------------------|
| <b>Mean</b> | 37.12      | 37.275      | 36.075     | <b>36.82333333</b> |
| <b>SD</b>   | 4.94447166 | 3.905018139 | 4.74789427 | <b>4.532461357</b> |

|                            |   |   |   |   |   |
|----------------------------|---|---|---|---|---|
| <i>NB F6 (17.20 mg/ml)</i> | 1 | 0 | 0 | 0 | 0 |
|                            | 2 | 0 | 0 | 0 | 0 |
|                            | 3 | 0 | 0 | 0 | 0 |
|                            | 4 | 0 | 0 | 0 | 0 |
|                            | 5 | 0 | 0 | 0 | 0 |

|             |   |   |   |          |
|-------------|---|---|---|----------|
| <b>Mean</b> | 0 | 0 | 0 | <b>0</b> |
| <b>SD</b>   | 0 | 0 | 0 | <b>0</b> |

*NB F7 (20 mg/ml)*

|   |   |   |   |   |   |
|---|---|---|---|---|---|
| 1 | 0 | 0 | 0 | 0 | 0 |
| 2 | 0 | 0 | 0 | 0 | 0 |
| 3 | 0 | 0 | 0 | 0 | 0 |
| 4 | 0 | 0 | 0 | 0 | 0 |
| 5 | 0 | 0 | 0 | 0 | 0 |

|             |   |   |   |   |   |
|-------------|---|---|---|---|---|
| <b>Mean</b> | 0 | 0 | 0 | 0 | 0 |
| <b>SD</b>   | 0 | 0 | 0 | 0 | 0 |
